# Supplementary figures and images for: New Nitric Oxide-Releasing Compounds as Promising Anti-Bladder Cancer Drugs
Source: MDPI journal article supplement (doi:10.3390/biomedicines11010199), 2023-01-12

# Supplementary material

## $^1\text{H}$ and $^{13}\text{C}$ -NMR spectra

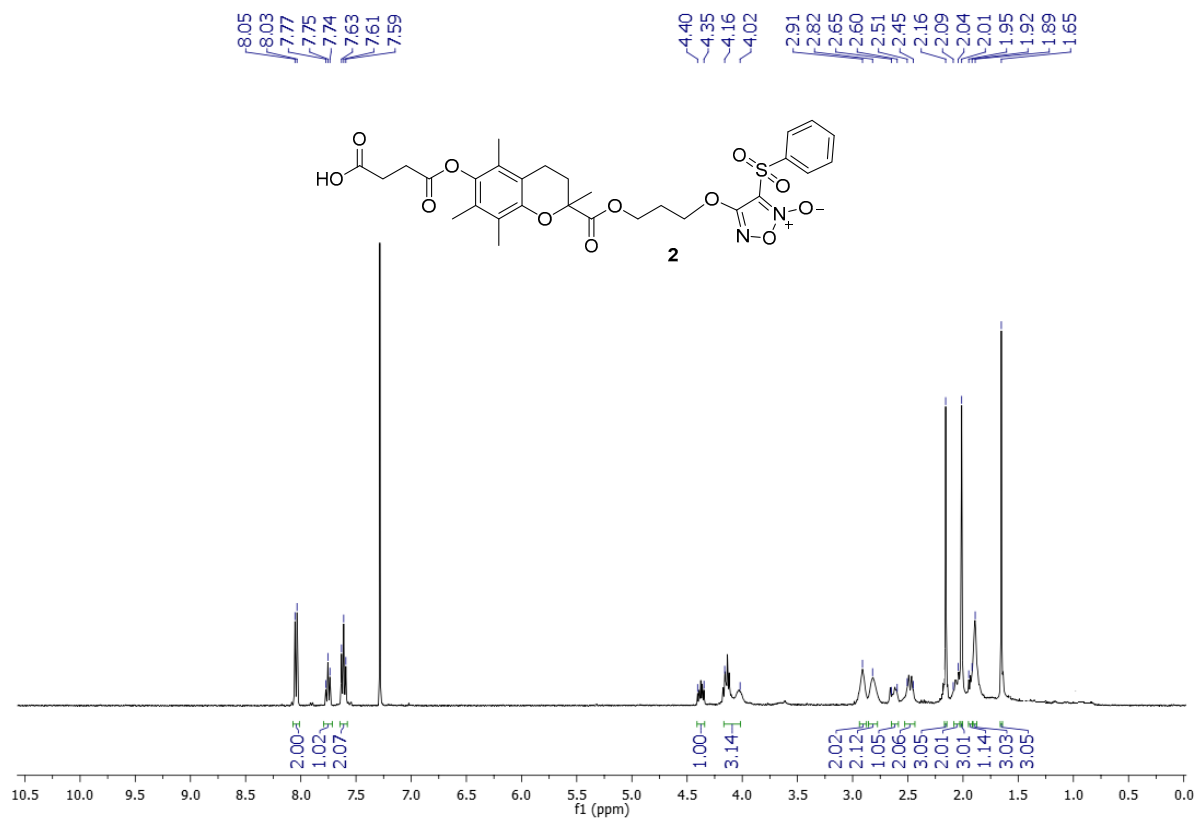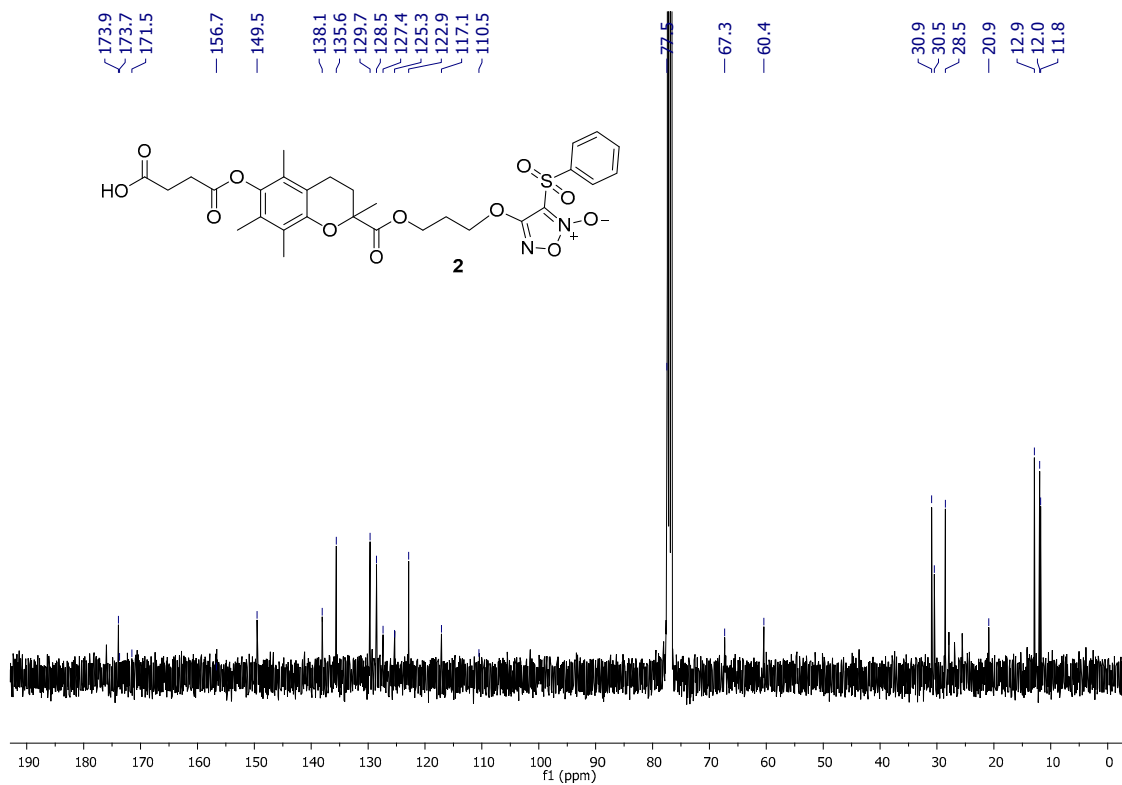

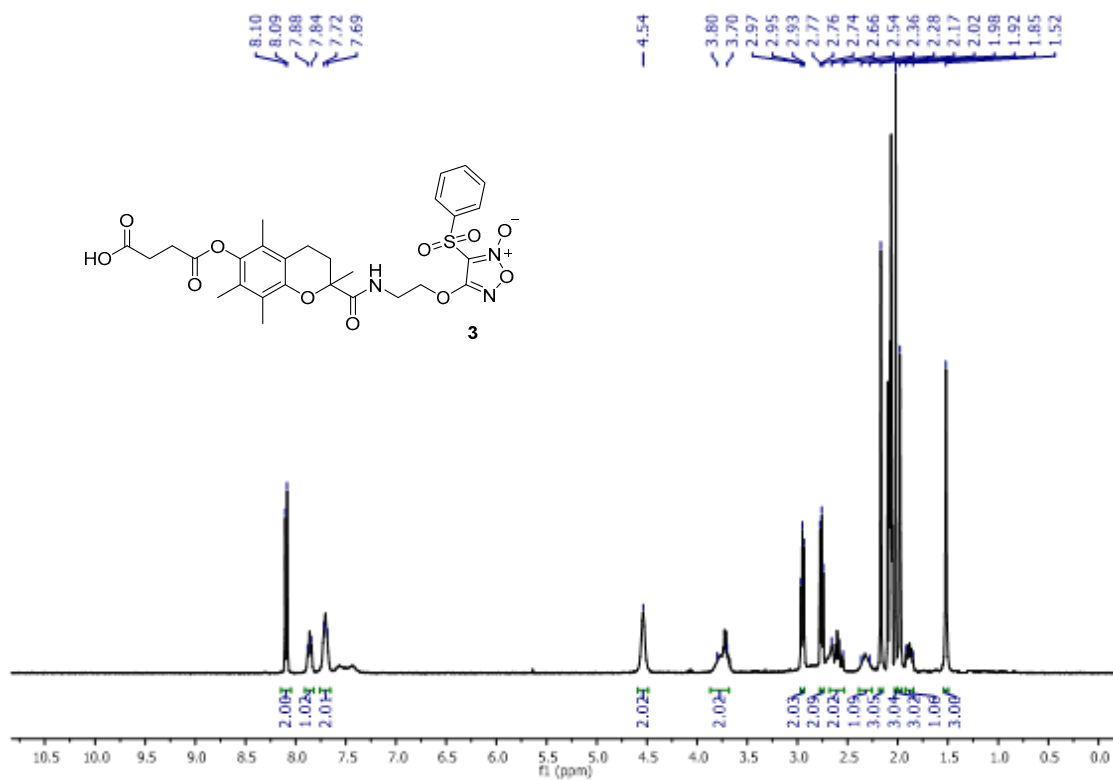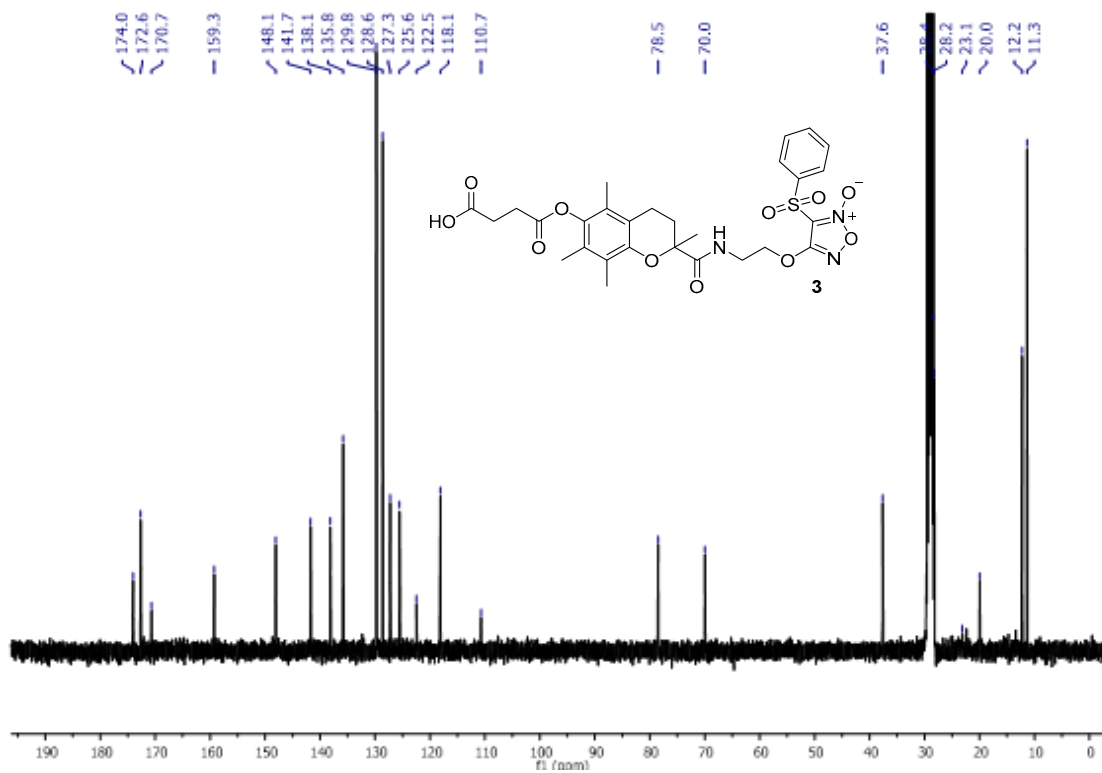

Supplement: s1 [file s1]
